# Supplementary material for: D–A copolymers with the benzo[1,2-b:4,5-c′]dithiophene-4,8-dione acceptor unit for polymer solar cells
Source: Royal Society of Chemistry journal article supplement (doi:10.1039/c5py01919b), 2015-12-29
Supplement: c5py01919b1.pdf [file c5py01919b1.pdf]

## Supporting Information

### **D-A copolymers with benzo[1,2-*b*:4,5-*c'*]dithiophene-4,8-dione acceptor unit for polymer solar cells**

Xiaojuan Zhao,<sup>‡ab</sup> Liu Qian,<sup>‡b</sup> Jiamin Cao,<sup>b</sup> Shouke Yan<sup>\*a</sup> and Liming Ding<sup>\*b</sup>

<sup>a</sup> *School of Materials Science and Engineering, Beijing University of Chemical Technology, Beijing 100029, China. E-mail: skyan@mail.buct.edu.cn*

<sup>b</sup> *Center for Excellence in Nanoscience, National Center for Nanoscience and Technology, Beijing 100190, China. E-mail: ding@nanoctr.cn*

<sup>‡</sup>These authors contributed equally to this work.

#### **1. General characterization**

#### **2. Synthesis**

#### **3. <sup>1</sup>H NMR**

#### **4. TGA**

#### **5. CV**

#### **6. Device fabrication and measurements**

#### **7. Optimization of device performance**

#### **8. AFM**

## 1. General characterization

$^1\text{H}$  and  $^{13}\text{C}$  NMR spectra were measured on a Bruker Avance-400 spectrometer. Absorption spectra were recorded on a Shimadzu UV-1800 spectrophotometer. Gel permeation chromatography (GPC) were performed on a Waters 1515-2410 series GPC coupled with differential refractive index detector using tetrahydrofuran as eluent and polystyrenes as standards. Thermogravimetric analysis was done using a NETZSCH TG209-F3 thermal analyzer under nitrogen. Cyclic voltammetry was conducted on a Shanghai Chenhua CHI620D voltammetric analyzer under argon in an anhydrous acetonitrile solution of tetra-*n*-butylammonium hexafluorophosphate (0.1 M). A glassy carbon electrode was used as the working electrode, a platinum-wire was used as the counter electrode, and a Ag/Ag<sup>+</sup> electrode was used as the reference electrode. Polymers were coated onto glassy carbon electrode and all potentials were corrected against Fc/Fc<sup>+</sup>. AFM was performed on a Dimension 3100 microscope (Veeco) using tapping mode. X-ray diffraction (XRD) of thin films was performed on a Rigaku D/max-2500 X-ray diffractometer in reflection mode using Cu K $\alpha$  radiation (40 kV, 200 mA).

## 2. Synthesis

All reagents were purchased from Alfa Aesar Co., Aladdin Co., J&K Co., Lyntech Co. and other commercial suppliers. All reactions dealing with air- or moisture-sensitive compounds were carried out using standard Schlenk techniques. 5,7-Dibromo-2-(2-ethylhexyl)benzo[1,2-*b*:4,5-*c'*]dithiophene-4,8-dione (**1**) was prepared according to literature.<sup>1</sup>

**5,7-Bis(4-(2-butyloctyl)thiophen-2-yl)-2-(2-ethylhexyl)benzo[1,2-*b*:4,5-*c'*]dithiophene-4,8-dione (2).** To a solution of compound **1** (400 mg, 0.82 mmol) in 70 mL toluene were added tributyl(4-butyloctylthiophen-2-yl)stannane (1.06 g, 1.96 mmol) and Pd(PPh<sub>3</sub>)<sub>4</sub> (70 mg) under Ar. The mixture was stirred at 110 °C for 12 h and then cooled to room temperature. The solvent was removed under reduced pressure and the crude product was purified via column chromatography over silica gel by using petroleum ether/CH<sub>2</sub>Cl<sub>2</sub> (3:1) as eluent to

give compound **2** as a red viscous liquid (488 mg, 72%). <sup>1</sup>H NMR (CDCl<sub>3</sub>, 400 MHz, δ/ppm): 7.68-7.66 (m, 2H), 7.33 (s, 1H), 7.11 (d, 2H), 2.83 (d, *J* = 6.7 Hz, 2H), 2.59 (d, *J* = 6.3 Hz, 4H), 1.67-1.60 (m, 1H), 1.41-1.28 (m, 42H), 0.94-0.86 (m, 18H). <sup>13</sup>C NMR (CDCl<sub>3</sub>, 100 MHz, δ/ppm): 176.10, 174.48, 155.26, 145.60, 144.42, 144.37, 144.07, 142.52, 142.46, 133.07, 133.02, 132.31, 132.24, 130.08, 129.69, 126.09, 124.50, 41.44, 38.95, 34.87, 34.83, 33.31, 33.00, 32.39, 31.92, 29.71, 28.88, 28.84, 26.60, 25.57, 23.07, 22.93, 22.17, 14.16, 14.13, 14.09, 10.80. MALDI-TOF MS (*m/z*): 834.6 (M+H<sup>+</sup>).

**5,7-Bis(5-bromo-4-(2-butyloctyl)thiophen-2-yl)-2-(2-ethylhexyl)benzo[1,2-*b*:4,5-*c'*]dithiophene-4,8-dione (3).** To a solution of compound **2** (470 mg, 0.56 mmol) in a mixed solvent of CHCl<sub>3</sub> (20 mL) and DMF (20 mL) was added NBS (245 mg, 1.38 mmol) under Ar. The mixture was stirred at room temperature for 24 h and then poured into water and extracted with CHCl<sub>3</sub> for three times. The combined organic layer was washed with brine and dried over anhydrous Na<sub>2</sub>SO<sub>4</sub>. The solvent was removed under reduced pressure and the crude product was purified via column chromatography over silica gel by using petroleum ether/CH<sub>2</sub>Cl<sub>2</sub> (6:1) as eluent to give compound **3** as a red solid (470 mg, 84%). <sup>1</sup>H NMR (CDCl<sub>3</sub>, 400 MHz, δ/ppm): 7.46 (d, 2H), 7.34 (s, 1H), 2.84 (d, *J* = 6.7 Hz, 2H), 2.55-2.53 (m, 4H), 1.70 (br, 1H), 1.38-1.28 (m, 42H), 0.93-0.86 (m, 18H). <sup>13</sup>C NMR (CDCl<sub>3</sub>, 100 MHz, δ/ppm): 175.84, 174.19, 155.79, 145.15, 144.09, 143.21, 142.84, 142.47, 142.44, 132.20, 132.16, 131.55, 131.52, 129.51, 129.15, 124.45, 116.46, 41.39, 34.84, 32.38, 31.94, 29.77, 29.70, 29.68, 29.67, 29.62, 29.51, 29.43, 29.38, 29.33, 28.83, 25.55, 22.94, 22.71, 14.13, 14.10, 10.80. MALDI-TOF MS (*m/z*): 992.4 (M+H<sup>+</sup>).

**PThBDTD.** Compound **3** (100 mg, 0.10 mmol) and 2,5-bis(trimethylstannyl)thiophene (41.3 mg, 0.10 mmol) were dissolved in 30 mL toluene, and the solution was flushed with argon for 15 min, then 8 mg Pd(PPh<sub>3</sub>)<sub>4</sub> was added into the solution. The mixture was flushed again with argon for 20 min. The reaction solution was heated to reflux for 24 h. Then the solution was cooled to room temperature and added dropwise to 150 mL methanol. The precipitate was collected and further purified via Soxhlet extraction by using methanol, hexane, and chloroform in sequence. The chloroform fraction was concentrated and added dropwise into

methanol. Subsequently, the precipitate was collected and dried under vacuum overnight to give **PThBDTD** as a purple-black solid (45mg, 49%).  $^1\text{H}$  NMR ( $\text{CDCl}_3$ , 400 MHz,  $\delta/\text{ppm}$ ): 8.04-7.45 (br, 2H), 7.30-7.25 (br, 1H), 7.08 (br, 2H), 2.72-2.71 (br, 6H), 1.73-1.23 (br, 43H), 0.87-0.81 (br, 18H). Elemental analysis (%) calcd for  $\text{C}_{54}\text{H}_{72}\text{O}_2\text{S}_5$ : C, 71.00; H, 7.94. Found: C, 68.38; H, 7.94.

**PTTBDTD.** **PTTBDTD** was synthesized by following the same procedures for **PThBDTD**. Compound **3** (80 mg, 0.08 mmol) and 2,5-bis(trimethylstannyl)thieno[3,2-*b*]thiophene (37.6 mg, 0.08 mmol) were used as the starting materials. **PTTBDTD** was obtained as a dark blue solid (60 mg, 77%).  $^1\text{H}$  NMR ( $\text{CDCl}_3$ , 400 MHz,  $\delta/\text{ppm}$ ): 8.09-7.85 (br, 2H), 7.45-7.04 (br, 3H), 2.76-2.54 (br, 6H), 1.74-1.18 (br, 43H), 0.87-0.84 (br, 18H). Elemental analysis (%) calcd for  $\text{C}_{56}\text{H}_{72}\text{O}_2\text{S}_6$ : C, 69.37; H, 7.49. Found: C, 68.66; H, 7.45.

### 3. $^1\text{H}$ NMR

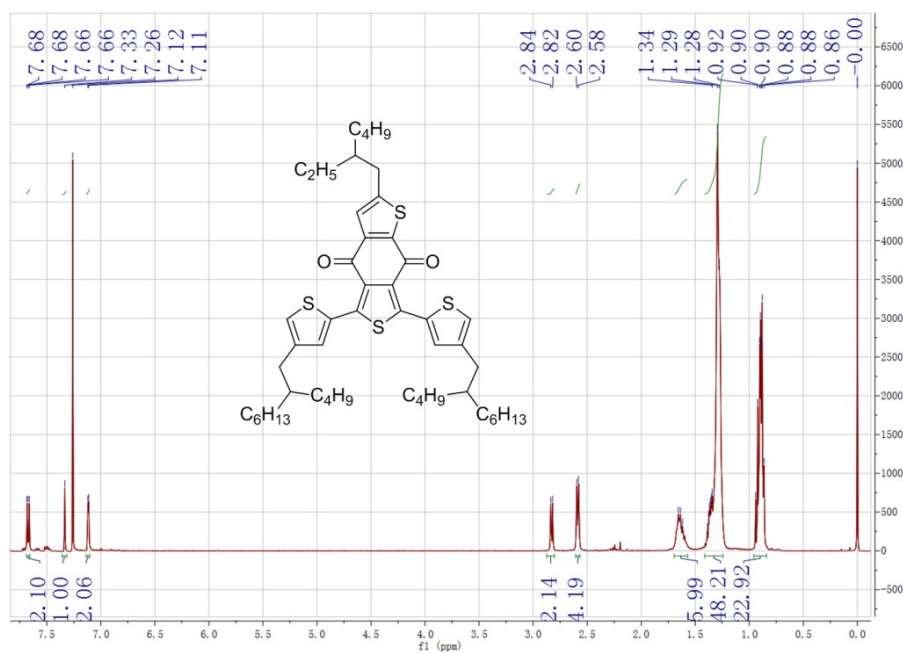

**Fig. S1**  $^1\text{H}$  NMR spectrum of compound **2**.

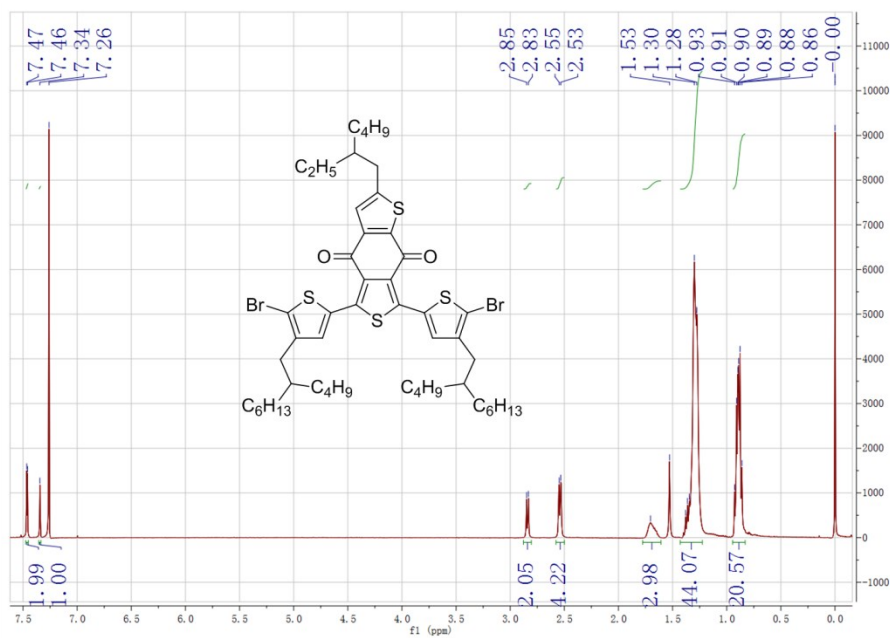

**Fig. S2**  $^1\text{H}$  NMR spectrum of compound **3**.

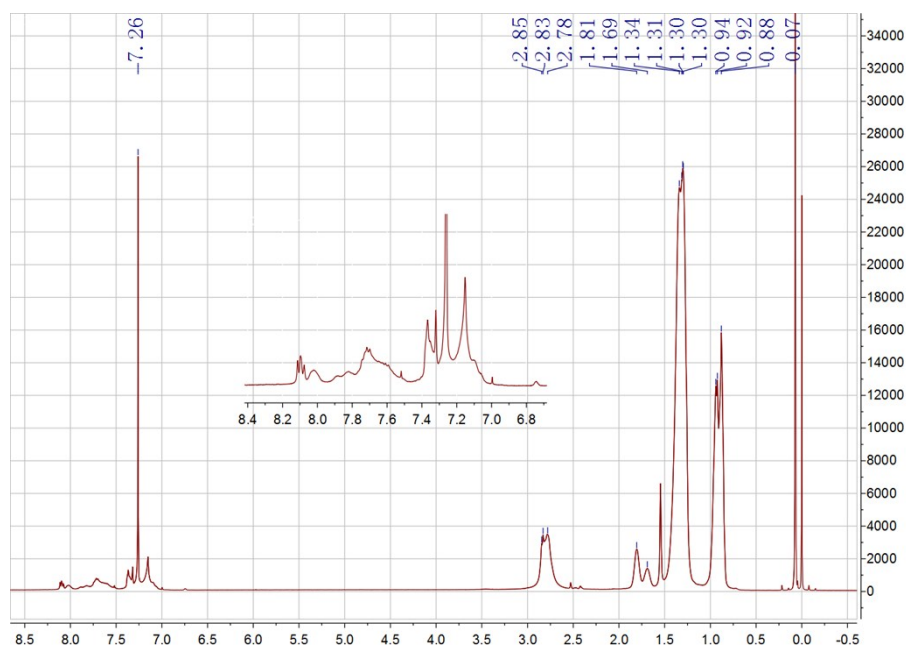

**Fig. S3**  $^1\text{H}$  NMR spectrum of PThBDTD.

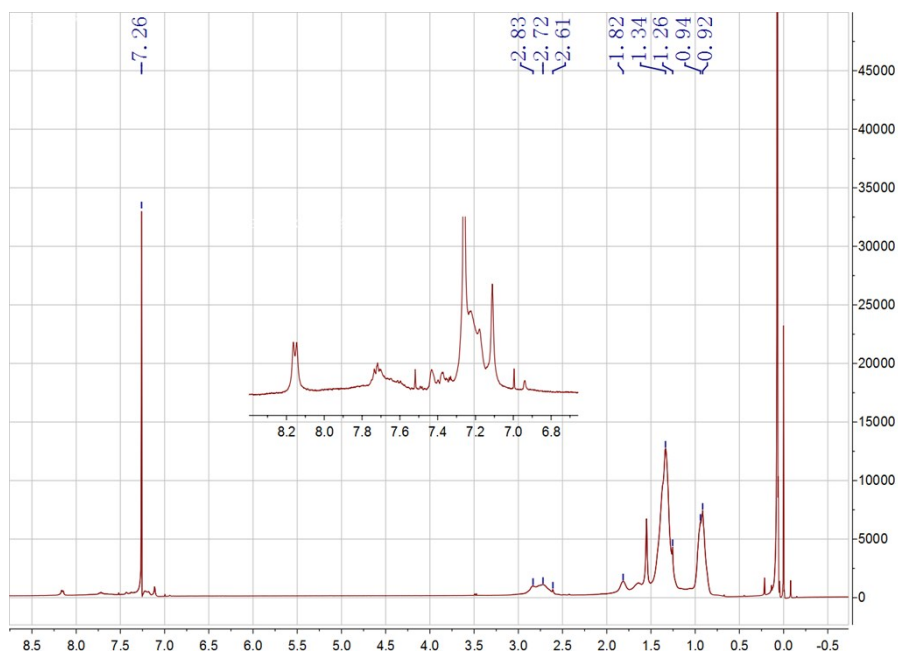

**Fig. S4**  $^1\text{H}$  NMR spectrum of PTTBDTD.

#### 4. TGA

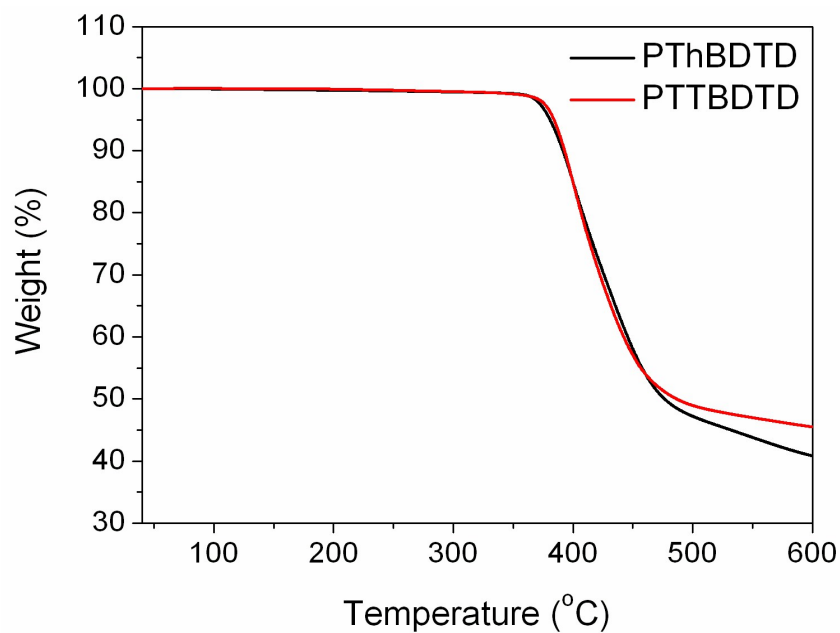

**Fig. S5** TGA curves for PThBDTD and PTTBDTD.

#### 5. CV

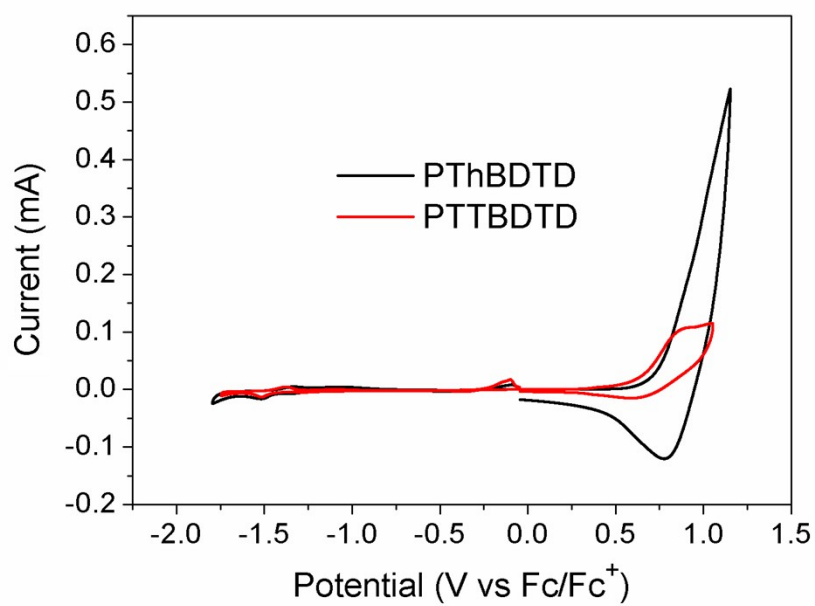

**Fig. S6** Cyclic voltammograms for PThBDTD and PTTBDTD.

## 6. Device fabrication and measurements

### Conventional solar cells

Patterned ITO glass with a sheet resistance of  $15 \Omega \text{ sq}^{-1}$  was ultrasonically cleaned using detergent, distilled water, acetone, isopropanol sequentially and then given UV-ozone treatment. A 30 nm thick poly(3,4-ethylenedioxythiophene)-polystyrenesulfonate (PEDOT:PSS, Clevios<sup>TM</sup> P VP Al 4083) layer was formed on ITO substrates by spin coating an aqueous dispersion onto ITO glass (4000 rpm for 30 s). PEDOT:PSS coated substrates were dried at 150 °C for 10 min. A polymer:PC<sub>71</sub>BM blend in CB with DIO additive was spin-coated onto PEDOT:PSS layer. Finally, Ca (~10 nm) and Al (~100 nm) were successively evaporated onto the active layer under a shadow mask (pressure ca.  $10^{-4}$  Pa). The effective area for the devices is 4 mm<sup>2</sup>. The thicknesses for the active layers were measured by using a KLA Tencor D-120 profilometer. *J-V* curves were measured by using a computerized Keithley 2400 SourceMeter and a Xenon-lamp-based solar simulator (Enli Tech, AM 1.5G, 100 mW/cm<sup>2</sup>). The illumination intensity of the solar simulator was determined by using a monocrystalline silicon solar cell (Oriel 91150, 2cm×2cm) calibrated by NIM. The external quantum efficiency (EQE) spectra were measured by using a QE-R3011 measurement system (Enli Tech).

### Inverted solar cells

ZnO precursor was prepared according to the literature.<sup>2</sup> The precursor solution was spin-coated onto ITO glass (4000 rpm for 30 s). The films were annealed at 200 °C for 30 min in air. ZnO film thickness is about 30 nm. A polymer:PC<sub>71</sub>BM blend in CB with DIO additive was spin-coated onto ZnO layer. MoO<sub>3</sub> (~6 nm) and Ag (~80 nm) was successively evaporated onto the active layer under a shadow mask (pressure ca.  $10^{-4}$  Pa).

### Hole-only devices

The structure of hole-only devices is ITO/PEDOT:PSS/active layer/MoO<sub>3</sub>/Al. A 30 nm thick PEDOT:PSS layer was made by spin coating an aqueous dispersion onto ITO glass (4000 rpm for 30 s). PEDOT substrates were dried at 150 °C for 10 min. A polymer:PC<sub>71</sub>BM blend in



CB with 2 vol% DIO additive was spin-coated onto PEDOT layer. Finally, MoO<sub>3</sub> (~6 nm) and Al (~100 nm) were successively evaporated onto the active layer under a shadow mask (pressure ca. 10<sup>-4</sup> Pa). *J-V* curves were measured by using a computerized Keithley 2400 SourceMeter in the dark.

## 7. Optimization of device performance

**Table S1** Optimization of D/A ratio for PThBDTD:PC<sub>71</sub>BM conventional solar cells.<sup>a</sup>

| D/A   | $V_{oc}$ | $J_{sc}$              | FF   | PCE                      |
|-------|----------|-----------------------|------|--------------------------|
| [w/w] | [V]      | [mA/cm <sup>2</sup> ] | [%]  | [%]                      |
| 1:0.8 | 0.89     | 8.23                  | 54.5 | 3.98 (3.79) <sup>b</sup> |
| 1:1.0 | 0.87     | 9.63                  | 51.3 | 4.26 (4.09)              |
| 1:1.2 | 0.87     | 9.06                  | 52.8 | 4.18 (4.02)              |
| 1:1.4 | 0.87     | 9.10                  | 51.7 | 4.09 (3.97)              |

<sup>a</sup>Blend solution: 18 mg/mL in CB with 3 vol% DIO; spin coating: 1200 rpm for 60 s. <sup>b</sup>Data in parentheses stand for the average PCEs for 10 cells.

**Table S2** Optimization of the active layer thickness for PThBDTD:PC<sub>71</sub>BM conventional solar cells.<sup>a</sup>

| Thickness | $V_{oc}$ | $J_{sc}$              | FF   | PCE                      |
|-----------|----------|-----------------------|------|--------------------------|
| [nm]      | [V]      | [mA/cm <sup>2</sup> ] | [%]  | [%]                      |
| 106       | 0.87     | 9.01                  | 53.0 | 4.13 (4.00) <sup>b</sup> |
| 114       | 0.88     | 9.09                  | 53.5 | 4.30 (4.13)              |
| 126       | 0.87     | 9.28                  | 50.3 | 4.06 (3.88)              |
| 133       | 0.86     | 9.62                  | 48.9 | 4.04 (3.86)              |
| 141       | 0.87     | 9.79                  | 46.8 | 3.98 (3.84)              |

<sup>a</sup>D/A ratio: 1:1 (w/w); blend solution: 18 mg/mL in CB with 3 vol% DIO. <sup>b</sup>Data in parentheses stand for the average PCEs for 10 cells.

**Table S3** Optimization of DIO content for PThBDTD:PC<sub>71</sub>BM conventional solar cells.<sup>a</sup>

| DIO      | $V_{oc}$ | $J_{sc}$              | FF   | PCE                      |
|----------|----------|-----------------------|------|--------------------------|
| [v/v, %] | [V]      | [mA/cm <sup>2</sup> ] | [%]  | [%]                      |
| 0        | 0.90     | 6.46                  | 30.2 | 1.76 (1.60) <sup>b</sup> |
| 1        | 0.87     | 5.65                  | 50.0 | 2.47 (2.14)              |
| 2        | 0.89     | 10.07                 | 59.1 | 5.28 (5.16)              |
| 3        | 0.87     | 8.42                  | 55.1 | 4.03 (3.86)              |
| 4        | 0.84     | 7.11                  | 49.3 | 2.94 (2.68)              |
| 5        | 0.81     | 5.64                  | 48.4 | 2.20 (1.92)              |

<sup>a</sup>D/A ratio: 1:1 (w/w); blend solution: 18 mg/mL in CB; spin coating: 1000 rpm for 60 s.

<sup>b</sup>Data in parentheses stand for the average PCEs for 10 cells.

**Table S4** Optimization of the active layer thickness for PThBDTD:PC<sub>71</sub>BM inverted solar cells.<sup>a</sup>

| Thickness | $V_{oc}$ | $J_{sc}$              | FF   | PCE                      |
|-----------|----------|-----------------------|------|--------------------------|
| [nm]      | [V]      | [mA/cm <sup>2</sup> ] | [%]  | [%]                      |
| 94        | 0.88     | 10.36                 | 64.6 | 5.90 (5.81) <sup>b</sup> |
| 101       | 0.88     | 10.40                 | 65.4 | 6.02 (5.90)              |
| 112       | 0.88     | 10.81                 | 66.2 | 6.32 (6.16)              |
| 121       | 0.88     | 11.53                 | 61.9 | 6.22 (6.10)              |
| 134       | 0.88     | 10.98                 | 63.4 | 6.11 (5.98)              |

<sup>a</sup>D/A ratio: 1:1 (w/w); blend solution: 18 mg/mL in CB with 2 vol% DIO. <sup>b</sup>Data in parentheses stand for the average PCEs for 10 cells.

**Table S5** Optimization of D/A ratio for PTTBDTD:PC<sub>71</sub>BM inverted solar cells.<sup>a</sup>

| D/A   | $V_{oc}$ | $J_{sc}$              | FF   | PCE                      |
|-------|----------|-----------------------|------|--------------------------|
| [w/w] | [V]      | [mA/cm <sup>2</sup> ] | [%]  | [%]                      |
| 1:0.8 | 0.73     | 13.80                 | 53.1 | 5.35 (5.13) <sup>b</sup> |
| 1:1.0 | 0.72     | 13.31                 | 57.1 | 5.45 (5.26)              |
| 1:1.2 | 0.72     | 14.31                 | 48.9 | 5.03 (4.80)              |
| 1:1.4 | 0.71     | 13.04                 | 47.9 | 4.43 (4.26)              |

<sup>a</sup>Blend solution: 16 mg/mL in CB with 3 vol% DIO; spin coating: 1200 rpm for 60 s. <sup>b</sup>Data in parentheses stand for the average PCEs for 10 cells.

**Table S6** Optimization of the active layer thickness for PTTBDTD:PC<sub>71</sub>BM inverted solar cells.<sup>a</sup>

| Thickness | $V_{oc}$ | $J_{sc}$              | FF   | PCE                      |
|-----------|----------|-----------------------|------|--------------------------|
| [nm]      | [V]      | [mA/cm <sup>2</sup> ] | [%]  | [%]                      |
| 98        | 0.72     | 12.41                 | 59.9 | 5.39 (5.19) <sup>b</sup> |
| 106       | 0.72     | 14.15                 | 53.3 | 5.44 (5.23)              |
| 113       | 0.73     | 14.42                 | 56.2 | 5.88 (5.59)              |
| 124       | 0.73     | 13.80                 | 53.1 | 5.35 (5.14)              |
| 140       | 0.71     | 12.95                 | 47.7 | 4.40 (4.33)              |

<sup>a</sup>D/A ratio: 1:1 (w/w); blend solution: 18 mg/mL in CB with 3 vol% DIO. <sup>b</sup>Data in parentheses stand for the average PCEs for 10 cells.

**Table S7** Optimization of DIO content for PTTBDTD:PC<sub>71</sub>BM inverted solar cells.<sup>a</sup>

| DIO      | $V_{oc}$ | $J_{sc}$              | FF   | PCE                      |
|----------|----------|-----------------------|------|--------------------------|
| [v/v, %] | [V]      | [mA/cm <sup>2</sup> ] | [%]  | [%]                      |
| 0        | 0.79     | 6.61                  | 32.9 | 1.72 (1.56) <sup>b</sup> |
| 1        | 0.75     | 13.70                 | 57.4 | 5.86 (5.66)              |
| 2        | 0.73     | 14.53                 | 56.5 | 6.00 (5.89)              |
| 3        | 0.73     | 14.34                 | 55.9 | 5.81 (5.68)              |
| 4        | 0.73     | 14.18                 | 54.4 | 5.61 (5.45)              |
| 5        | 0.73     | 13.84                 | 55.3 | 5.58 (5.42)              |

<sup>a</sup>D/A ratio: 1:1 (w/w); blend solution: 18 mg/mL in CB; spin coating: 1000 rpm for 60 s.

<sup>b</sup>Data in parentheses stand for the average PCEs for 10 cells.

## 8. AFM

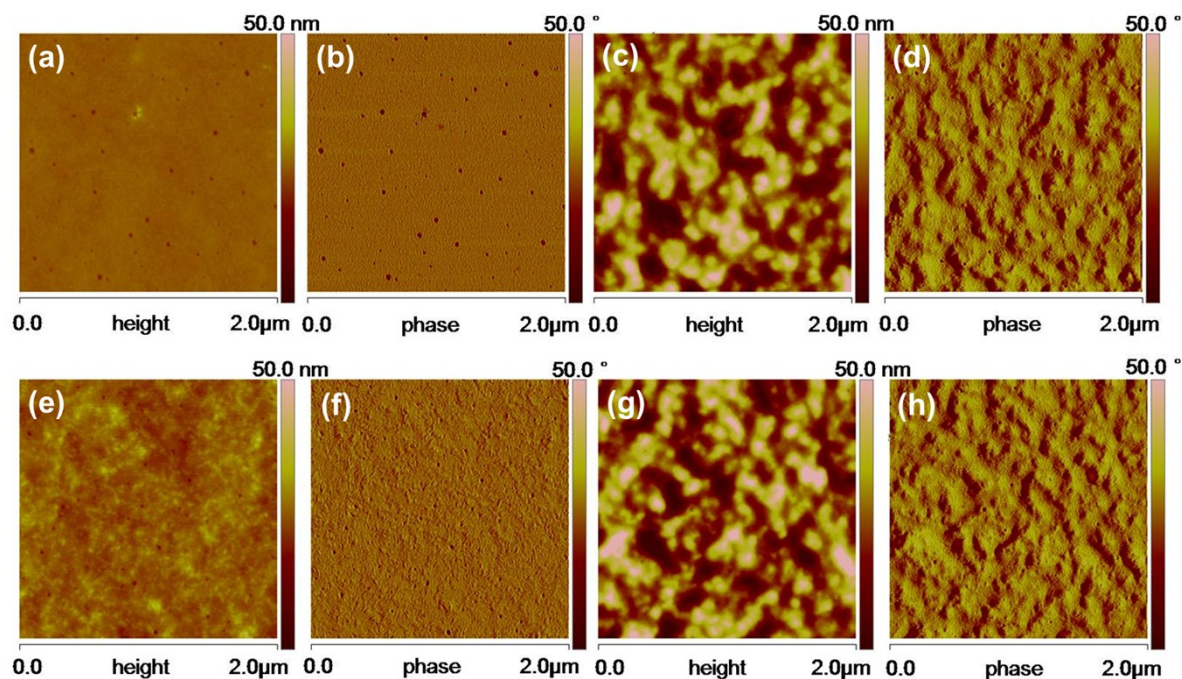

**Fig. S7** AFM height and phase images for PThBDTD:PC<sub>71</sub>BM blend films without (a, b) and with 2 vol% DIO (c, d); PTTBDTD:PC<sub>71</sub>BM blend films without (e, f) and with 2 vol% DIO (g, h).

## References

- [1] H. Bin, L. Xiao, Y. Liu, P. Shen and Y. Li, *J. Polym. Sci., Part A: Polym. Chem.*, 2014, **52**, 1929.
- [2] Y. Sun, J. H. Seo, C. J. Takacs, J. Seifter and A. J. Heeger, *Adv. Mater.*, 2011, **23**, 1679.
